# Supplementary material
Source: PubMed Central journal article supplement (PMC4156524)
Supplement: NIHMS615001-supplement-01.pdf [file NIHMS615001-supplement-01.pdf]

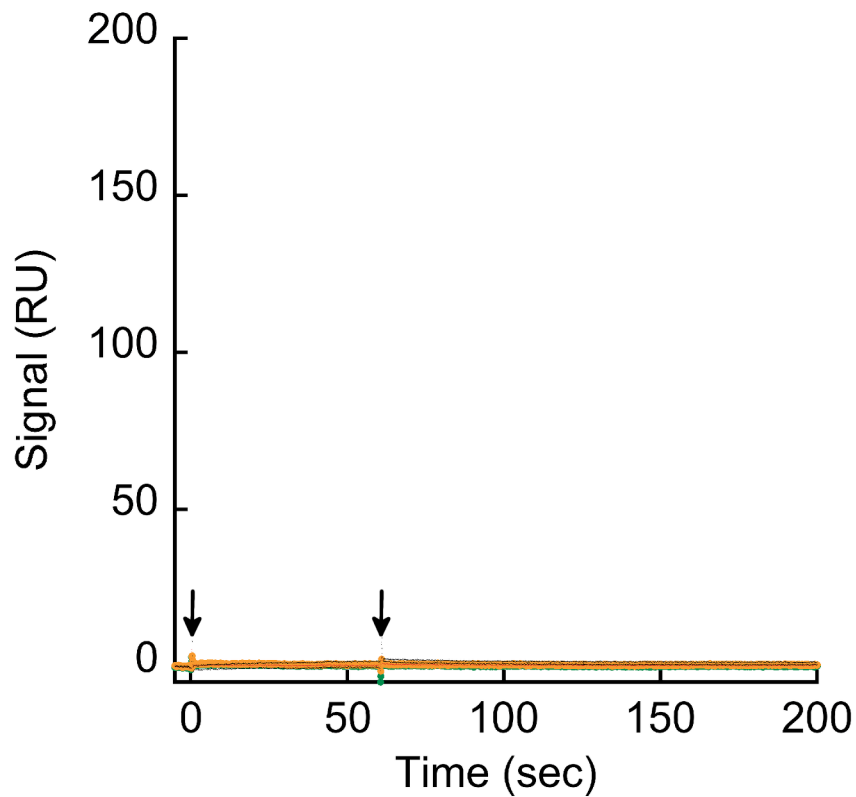

**Figure S1, reference to Figure 1.** Negative control binding experiments using the MHC-like molecule MULT-1. SPR binding sensograms collected using immobilized m04ED (WT) with increasing concentrations of MULT-1 flow-through, as outlined in Experimental Procedures. The start of the injection (association) and wash out (dissociation) phases are indicated with vertical arrows. Unlike full-length D<sup>d</sup> (Figure 1b), this MHC-like molecule, lacking the  $\alpha_3$  domain, bound peptide and  $\beta_2$ -microglobulin shows a flat binding profile (after correction of non-specific refractive index changes using a mock surface without m04ED) that is typically of a lack of specific binding to the m04ED surface.

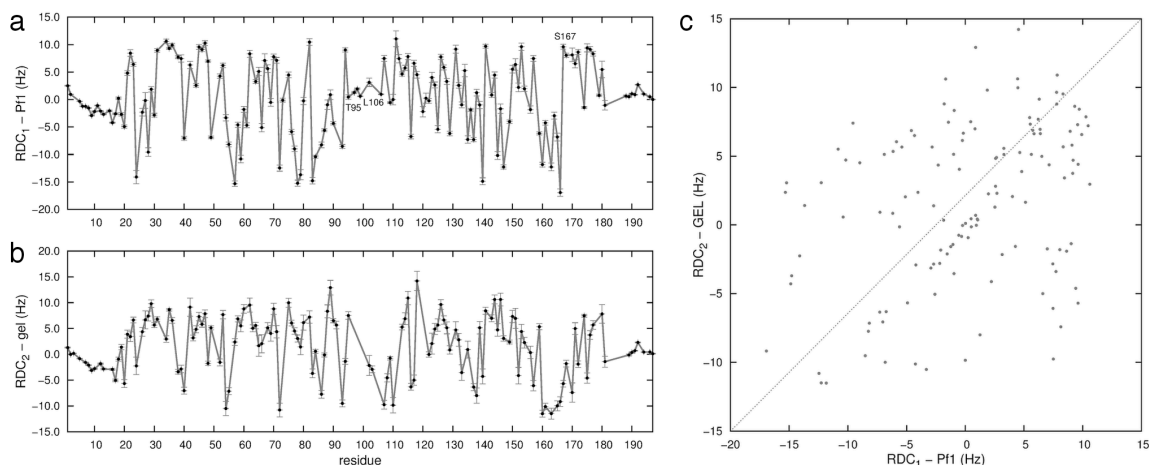

**Figure S2, reference to Table 2.**  $^{15}\text{N}$ - $^1\text{H}$  backbone RDC values measured in two alignment media for m04ED (Figure 1c). Values measured in **(a)** bacteriophage Pf1 and **(b)** positively charged gels, correspond to approximate alignment tensor magnitudes and Rhombicities of -8.3 Hz/0.19 and -7.0 Hz/0.40 respectively, as estimated using the histogram method (Cloue et al., 1998). The RDC splittings were measured for well-resolved peaks in the 2D TROSY-HSQC spectrum using a quantitative ARTSY experiment (Fitzkee and Bax, 2010). Error bars report experimental uncertainties as propagated from the spectral peak-to-noise ratio. Key residues defining the central flexible loop region and kinked C-terminal helix are indicated. **(c)** Correlation diagram between the two RDC datasets, showing a linear correlation coefficient of 0.36 (Tolman and Ruan, 2006), indicating the datasets are nearly independent.

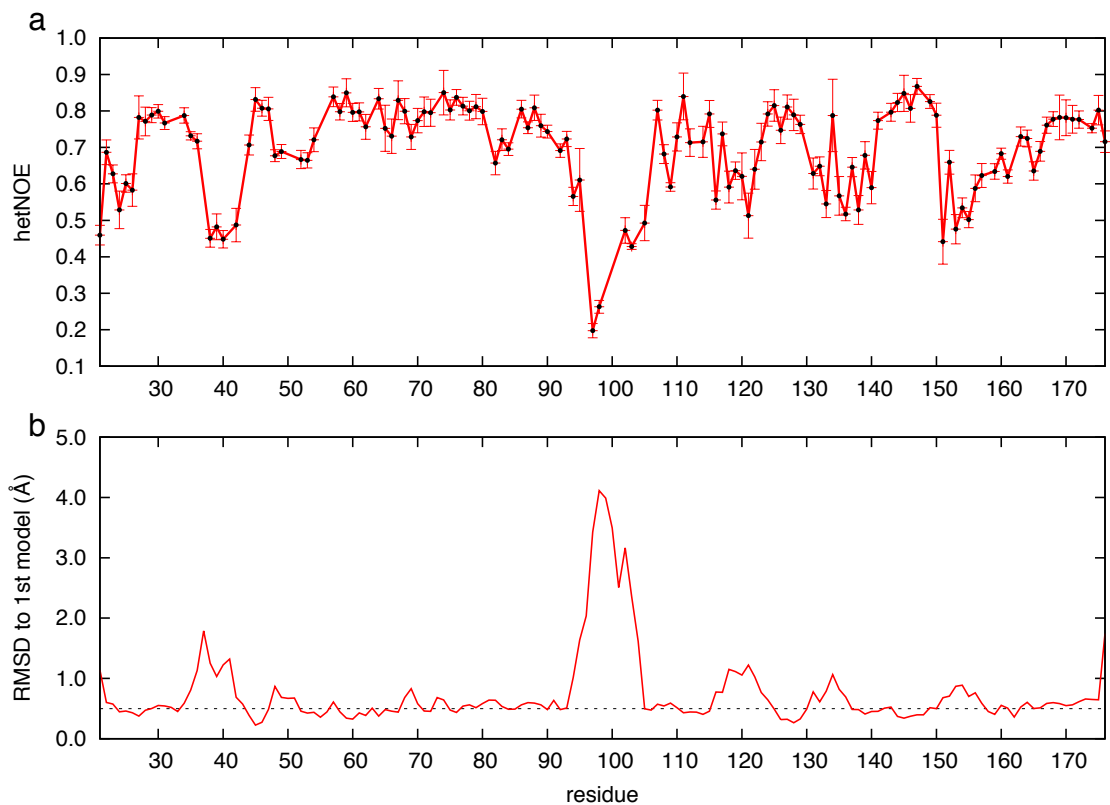

**Figure S3, reference to Figure 3.** Structural convergence in the final CS-Rosetta ensemble shown in Figure 3c. **(a)** Experimental  $^{15}\text{N}\{-^1\text{H}\}$  NOE values from Figure 2a plotted only for m04ED core residues 21-176 included in the Rosetta structure calculations. Errors are propagated from the spectral peak-to-noise ratios. **(b)** Average backbone heavy atom RMSD values computed over the 10 lowest-energy models from the final CS-Rosetta calculations (Table 1, #7 and Figure 3c).

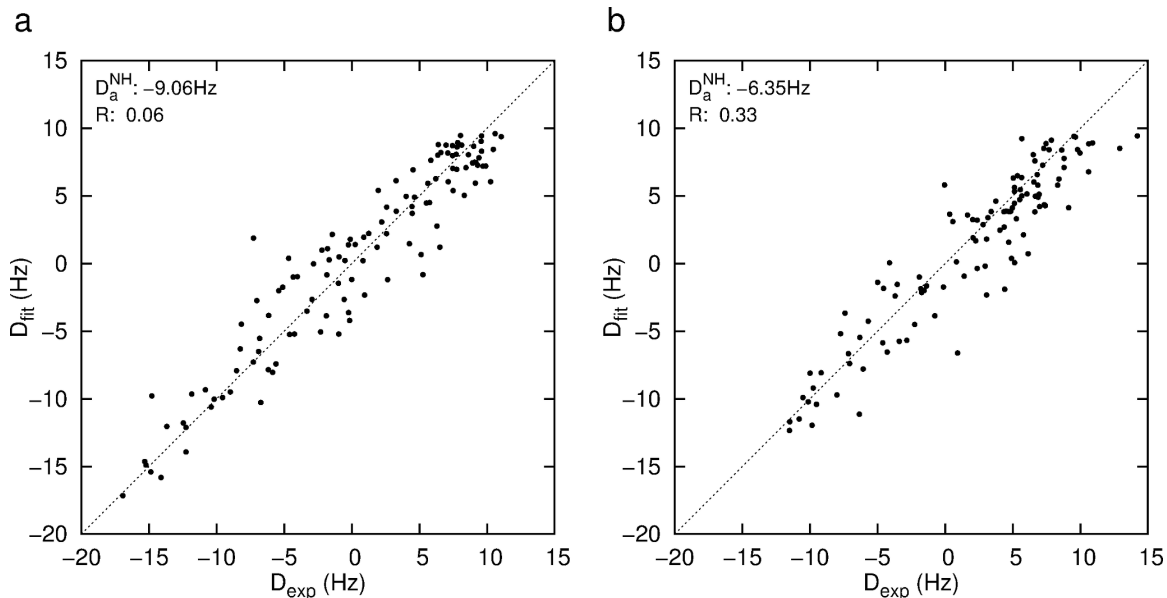

**Figure S4, reference to Figure 3, Table 2.** Structure fits to the RDC experimental data, shown for the top-ranking model from the final NMR ensemble of Figure 3c. The final RDC quality ( $Q$ ) factors (Cornilescu et al., 1998) for the Pf1 (**a**) and gel (**b**) datasets are 0.29 and 0.41 respectively (Pearson's linear correlation coefficients ( $R_p$ ) of 95% and 90%). The structure-based fitted alignment tensor magnitudes and rhombicities are indicated in each plot.

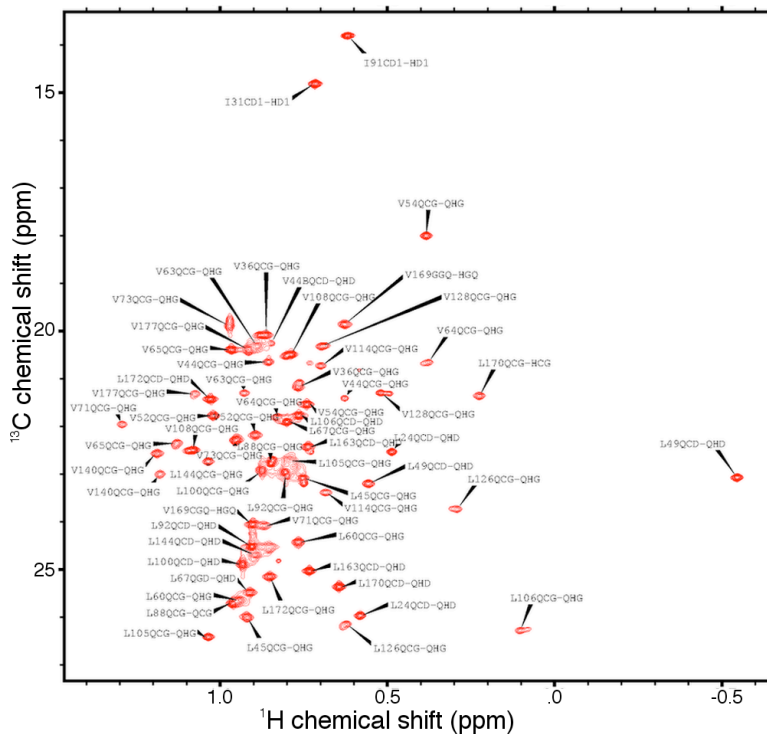

**Figure S5, reference to Figure 1.** Methyl region of a  $^1\text{H}$ - $^{13}\text{C}$  HMQC spectrum recorded at 900 MHz using an ILV methyl  $^{13}\text{C}$ -labeled sample of m04ED (Figure 1c). The complete resonance assignments of 2 Ile  $\text{C}^{\delta 1}$ , 16 Leu  $\text{C}^{\delta 1}$ ,  $\text{C}^{\delta 2}$  and 15 Val  $\text{C}^{\gamma 1}$ ,  $\text{C}^{\gamma 2}$  are indicated.
